# Supplementary material
Source: PubMed Central journal article supplement (PMC4144113)
Supplement: 113.076505_ajcn076505SupplementaryData2.pdf [file 113.076505_ajcn076505SupplementaryData2.pdf]

**Table 2. Regression analyses of blood lipids/lipoproteins vs. added sugars and dietary fat, run separately<sup>1,2,3</sup>**

|                    | Total Cholesterol |                 | Triglycerides |                 | LDL Cholesterol |                 | HDL Cholesterol |                 |
|--------------------|-------------------|-----------------|---------------|-----------------|-----------------|-----------------|-----------------|-----------------|
|                    | b Coeff.          | 95% CI          | b Coeff.      | 95% CI          | b Coeff.        | 95% CI          | b Coeff.        | 95% CI          |
| Added Sugars (g/d) | 0.0276            | -0.0758, 0.1310 | 0.1090        | 0.0169, 0.2011  | 0.0318          | -0.0668, 0.1304 | -0.0127         | -0.0546, 0.0293 |
| Dietary Fat (g/d)  | 0.1087            | -0.1732, 0.3906 | -0.1351       | -0.3781, 0.1079 | 0.0769          | -0.1921, 0.3459 | 0.0496          | -0.0651, 0.1642 |

1. Models were linear regressions with statistically significant associations where 95% Confidence Intervals do not cross zero.
2. All analyses controlled for the following covariates: sex, race/ethnicity (dummy coded), socioeconomic status, Tanner pubertal status, body fat percentage, total physical activity, and total energy intake.
3. In the above models, the sample size for which all variables were available was n=210.
